# Supplementary material
Source: Springer Nature journal article supplement (https://www.springermedizin.de/resource/supplementary/12885_2008_1635_MOESM1_ESM.pdf/9472518)
Supplement: MOESM1 [file 9472518]

# Grohmann *et al.* Additional File 1

**Additional File 1** Codon usage of the bacterial *ntr* vs. the synthetic *ntro* gene.

| aa | codon | frequency (%) <sup>#</sup> |                    | number     |             | frequency (%) |             |     |
|----|-------|----------------------------|--------------------|------------|-------------|---------------|-------------|-----|
|    |       | <i>E. coli</i>             | <i>M. musculus</i> | <i>ntr</i> | <i>ntro</i> | <i>ntr</i>    | <i>ntro</i> |     |
| A  | Ala   | GCT                        | 15                 | 30         | 4           | 19            | 15          | 70  |
|    |       | GCC                        | 28                 | 42         | 12          | 8             | 44          | 30  |
|    |       | GCA                        | 21                 | 22         | 5           | -             | 19          | -   |
|    |       | GCG                        | 36                 | 6          | 6           | -             | 22          | -   |
| R  | Arg   | CGT                        | 35                 | 12         | 5           | -             | 71          | -   |
|    |       | CGC                        | 40                 | 18         | 2           | -             | 29          | -   |
|    |       | CGA                        | 5                  | 11         | -           | -             | -           | -   |
|    |       | CGG                        | 11                 | 19         | -           | -             | -           | -   |
|    |       | AGA                        | 5                  | 17         | -           | -             | -           | -   |
|    |       | AGG                        | 4                  | 22         | -           | 7             | -           | 100 |
| N  | Asn   | AAT                        | 57                 | 40         | 1           | -             | 13          | -   |
|    |       | AAC                        | 43                 | 60         | 7           | 8             | 88          | 100 |
| D  | Asp   | GAT                        | 66                 | 30         | 13          | 11            | 76          | 65  |
|    |       | GAC                        | 34                 | 70         | 4           | 6             | 24          | 35  |
| C  | Cys   | TGT                        | 42                 | 42         | 1           | -             | 100         | -   |
|    |       | TGC                        | 58                 | 58         | -           | 1             | -           | 100 |
| Q  | Gln   | CAA                        | 35                 | 13         | 2           | -             | 29          | -   |
|    |       | CAG                        | 65                 | 87         | 5           | 7             | 71          | 100 |
| E  | Glu   | GAA                        | 62                 | 36         | 9           | 5             | 69          | 38  |
|    |       | GAG                        | 38                 | 64         | 4           | 8             | 31          | 62  |
| G  | Gly   | GGT                        | 30                 | 22         | 8           | -             | 73          | -   |
|    |       | GGC                        | 41                 | 35         | 3           | 11            | 27          | 100 |
|    |       | GGA                        | 10                 | 21         | -           | -             | -           | -   |
|    |       | GGG                        | 18                 | 23         | -           | -             | -           | -   |
| H  | His   | CAT                        | 56                 | 37         | 4           | -             | 57          | -   |
|    |       | CAC                        | 44                 | 63         | 3           | 7             | 43          | 100 |
| I  | Ile   | ATT                        | 48                 | 32         | 2           | -             | 29          | -   |
|    |       | ATC                        | 45                 | 55         | 5           | 7             | 71          | 100 |
|    |       | ATA                        | 7                  | 13         | -           | -             | -           | -   |
| L  | Leu   | TTA                        | 14                 | 6          | 2           | -             | 11          | -   |
|    |       | TTG                        | 15                 | 13         | -           | -             | -           | -   |
|    |       | CTT                        | 11                 | 12         | 2           | -             | 11          | -   |
|    |       | CTC                        | 12                 | 18         | 3           | 3             | 16          | 16  |
|    |       | CTA                        | 3                  | 8          | 1           | -             | 5           | -   |
|    |       | CTG                        | 45                 | 42         | 11          | 16            | 58          | 84  |
| K  | Lys   | AAA                        | 77                 | 35         | 14          | 3             | 78          | 17  |
|    |       | AAG                        | 23                 | 65         | 4           | 15            | 22          | 83  |
| M  | Met   | ATG                        | 100                | 100        | 5           | 5             | 100         | 100 |
|    |       |                            |                    |            |             |               |             |     |
| F  | Phe   | TTT                        | 61                 | 34         | 6           | -             | 55          | -   |
|    |       | TTC                        | 39                 | 66         | 5           | 11            | 45          | 100 |
| P  | Pro   | CCT                        | 14                 | 26         | -           | 6             | -           | 75  |
|    |       | CCC                        | 6                  | 35         | 1           | 2             | 13          | 25  |
|    |       | CCA                        | 18                 | 28         | 1           | -             | 13          | -   |
|    |       | CCG                        | 61                 | 11         | 6           | -             | 75          | -   |
| S  | Ser   | TCT                        | 15                 | 16         | 2           | -             | 15          | -   |
|    |       | TCC                        | 14                 | 26         | 4           | 3             | 31          | 23  |
|    |       | TCA                        | 11                 | 13         | -           | -             | -           | -   |
|    |       | TCG                        | 20                 | 5          | 1           | -             | 8           | -   |
|    |       | AGT                        | 16                 | 13         | 1           | -             | 8           | -   |
|    |       | AGC                        | 25                 | 28         | 5           | 10            | 38          | 77  |
| T  | Thr   | ACT                        | 14                 | 24         | 1           | -             | 9           | -   |
|    |       | ACC                        | 47                 | 35         | 6           | 11            | 55          | 100 |
|    |       | ACA                        | 11                 | 32         | -           | -             | -           | -   |
|    |       | ACG                        | 27                 | 9          | 4           | -             | 36          | -   |
| W  | Trp   | TGG                        | 100                | 100        | 3           | 3             | 100         | 100 |
| Y  | Tyr   | TAT                        | 69                 | 40         | 1           | -             | 25          | -   |
|    |       | TAC                        | 31                 | 60         | 3           | 4             | 75          | 100 |
| V  | Val   | GTT                        | 25                 | 14         | 8           | -             | 40          | -   |
|    |       | GTC                        | 18                 | 28         | 4           | -             | 20          | -   |
|    |       | GTA                        | 14                 | 7          | 2           | -             | 10          | -   |
|    |       | GTG                        | 43                 | 51         | 6           | 20            | 30          | 100 |
| *  | Stop  | TAA                        | 64                 | 24         | 1           | -             | 100         | -   |
|    |       | TAG                        | 9                  | 41         | -           | -             | -           | -   |
|    |       | TGA                        | 27                 | 34         | -           | 1             | -           | 100 |

<sup>#</sup> adapted from www.kazusa.or.jp
